# Supplementary material for: Functional Characterization of the mazEF Toxin-Antitoxin System in the Pathogenic Bacterium Agrobacterium tumefaciens
Source: MDPI journal article supplement (doi:10.3390/microorganisms9051107), 2021-05-20
Supplement: s1 [file s1]

**Table S1.** TA system candidates from *A. tumefaciens* C58 genome.

| No | Type | Toxin   | Antitoxin | Location         | Classification(family/domain) |
|----|------|---------|-----------|------------------|-------------------------------|
| 1  | 2    | Atu0940 | Atu0939   | 928967..929592   | mazEF/AbrB-MazF               |
| 2  | 2    | Atu1078 | Atu1079   | 1070711..1071287 | RelBE or parDE/RHH-RelE       |
| 3  | 2    | Atu1311 | Atu1312   | 1304040..1305011 | -/RHH-GNAT                    |
| 4  | 2    | Atu1628 | Atu1629   | 1614348..1615015 | -/ArsR-COG3832                |
| 5  | 2    | Atu8169 | Atu2028   | 1988551..1989404 | -/ArsR-COG3832                |
| 6  | 2    | Atu2033 | Atu2034   | 1992395..1993289 | -/ArsR-COG3832                |
| 7  | 2    | Atu2326 | Atu2325   | 2301360..2302012 | -HEPN-MNT                     |
| 8  | 2    | Atu2017 | Atu2018   | 1979333..1979853 | RelBE or parDE/RHH-RelE       |
| 9  | 2    | Atu0246 | Atu0245   | 243980..245097   | -/Xre-GNAT                    |
| 10 | 2    | Atu0674 | Atu0675   | 670257..670737   | relBE/RHH-RelE                |
| 11 | 2    | Atu0849 | Atu0848   | 849385..850489   | -/COG5642-COG5654             |
| 12 | 2    | Atu0934 | Atu0935   | 924141..924748   | relBE/RHH-RelE                |
| 13 | 2    | Atu1004 | Atu1005   | 1001210..1001826 | vapBA/RHH-PIN                 |
