# Supplementary material for: Functional Characterization of the mazEF Toxin-Antitoxin System in the Pathogenic Bacterium Agrobacterium tumefaciens
Source: MDPI journal article supplement (doi:10.3390/microorganisms9051107), 2021-05-20

# Arabinose concentration

0%

0.2%

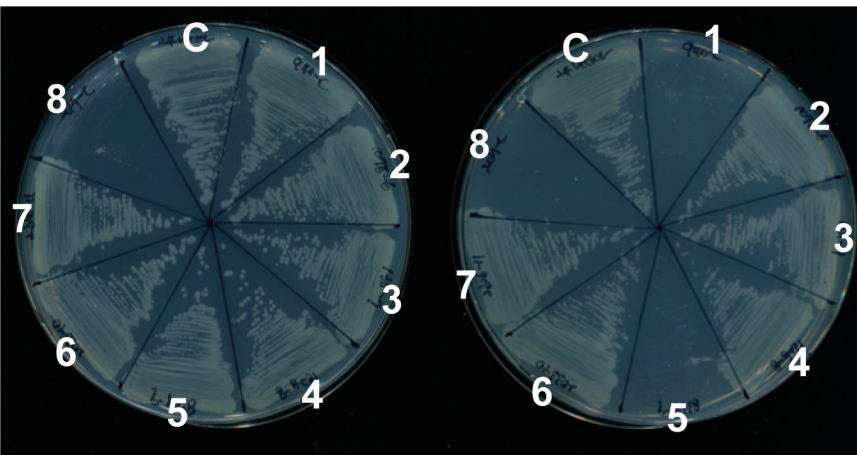

C: pET24

1: pET24-*atu0940*

2: pET24-*atu1078*

3: pET24-*atu1311*

4: pET24-*atu1628*

5: pET24-*atu8169*

6: pET24-*atu2033*

7: pET24-*atu2326*

8: pET24-*atu2017*

9: pET24-*atu0246*

10: pET24-*atu0674*

11: pET24-*atu0849*

12: pET24-*atu0934*

13: pET24-*atu1004*

# Arabinose concentration

0%

0.2%

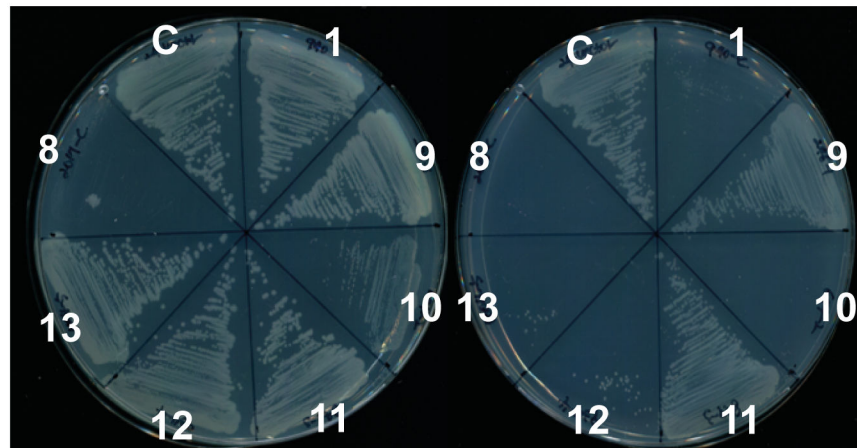

Supplement: s1 [file s1]
