# Supplementary material for: Functional Characterization of the mazEF Toxin-Antitoxin System in the Pathogenic Bacterium Agrobacterium tumefaciens
Source: MDPI journal article supplement (doi:10.3390/microorganisms9051107), 2021-05-20
Supplement: s1 [file s1]

**Table S2.** High structural similarity homologs of MazF-at using J-pred server.

| <b>PDB</b>  | <b>Chain</b> | <b>Description</b>      | <b>Blast E-value</b> |
|-------------|--------------|-------------------------|----------------------|
| 2c06        | B            | KID TOXIN PROTEIN       | 1.00E-13             |
| 2c06        | A            | KID TOXIN PROTEIN       | 1.00E-13             |
| 1m1f        | B            | Kid toxin protein       | 1.00E-13             |
| 1m1f        | A            | Kid toxin protein       | 1.00E-13             |
| 5cr2        | C            | Endoribonuclease MazF   | 8.00E-08             |
| 5cr2        | B            | Endoribonuclease MazF   | 8.00E-08             |
| 5cr2        | A            | Endoribonuclease MazF   | 8.00E-08             |
| 5co7        | F            | Endoribonuclease MazF   | 8.00E-08             |
| 5co7        | E            | Endoribonuclease MazF   | 8.00E-08             |
| 5co7        | D            | Endoribonuclease MazF   | 8.00E-08             |
| 5co7        | C            | Endoribonuclease MazF   | 8.00E-08             |
| 5co7        | B            | Endoribonuclease MazF   | 8.00E-08             |
| 5co7        | A            | Endoribonuclease MazF   | 8.00E-08             |
| 5ckb        | B            | Endoribonuclease MazF   | 8.00E-08             |
| 5ckb        | A            | Endoribonuclease MazF   | 8.00E-08             |
| 5ck9        | B            | Endoribonuclease MazF   | 8.00E-08             |
| 5ck9        | A            | Endoribonuclease MazF   | 8.00E-08             |
| 3nfc        | F            | PemK-like protein 1     | 8.00E-08             |
| 3nfc        | E            | PemK-like protein 1     | 8.00E-08             |
| 3nfc        | D            | PemK-like protein 1     | 8.00E-08             |
| 3nfc        | C            | PemK-like protein 1     | 8.00E-08             |
| 3nfc        | B            | PemK-like protein 1     | 8.00E-08             |
| 3nfc        | A            | PemK-like protein 1     | 8.00E-08             |
| 1ub4        | B            | MazF protein            | 3.00E-07             |
| 1ub4        | A            | MazF protein            | 3.00E-07             |
| 5cqy        | B            | Endoribonuclease MazF   | 4.00E-07             |
| 5cqy        | A            | Endoribonuclease MazF   | 4.00E-07             |
| 5cqx        | B            | Endoribonuclease MazF   | 4.00E-07             |
| <u>5cqx</u> | A            | Endoribonuclease MazF   | 4.00E-07             |
| <u>5ckh</u> | B            | Endoribonuclease MazF   | 4.00E-07             |
| <u>5ckh</u> | A            | Endoribonuclease MazF   | 4.00E-07             |
| <u>5ckf</u> | B            | Endoribonuclease MazF   | 4.00E-07             |
| <u>5ckf</u> | A            | Endoribonuclease MazF   | 4.00E-07             |
| <u>5cke</u> | B            | Endoribonuclease MazF   | 4.00E-07             |
| <u>5cke</u> | A            | Endoribonuclease MazF   | 4.00E-07             |
| <u>5ckd</u> | B            | Endoribonuclease MazF   | 4.00E-07             |
| <u>5ckd</u> | A            | Endoribonuclease MazF   | 4.00E-07             |
| <u>7bye</u> | F            | Uncharacterized protein | 3.00E-06             |
| <u>7bye</u> | E            | Uncharacterized protein | 3.00E-06             |
| <u>7bye</u> | C            | Uncharacterized protein | 3.00E-06             |
| <u>7bye</u> | B            | Uncharacterized protein | 3.00E-06             |
